# Supplementary material for: High entropy alloy nitrides with integrated nanowire/nanosheet architecture for efficient alkaline hydrogen evolution reactions
Source: Royal Society of Chemistry journal article supplement (doi:10.1039/d1nj04509a), 2021-01-01
Supplement: d1nj04509a1.pdf [file d1nj04509a1.pdf]

## Supporting Information

### **High entropy alloy nitrides with integrated nanowire/nanosheets architectures for efficient alkaline hydrogen evolution reaction**

*Chen Liu, Han Zhu\*, Shuanglong Lu, Fang Duan, Mingliang Du\**

*Key Laboratory of Synthetic and Biological Colloids, Ministry of Education, School of Chemical and Material Engineering, Jiangnan University, Wuxi 214122, P. R. China. E-mail: zhysw@jiangnan.edu.cn; du@jiangnan.edu.cn*

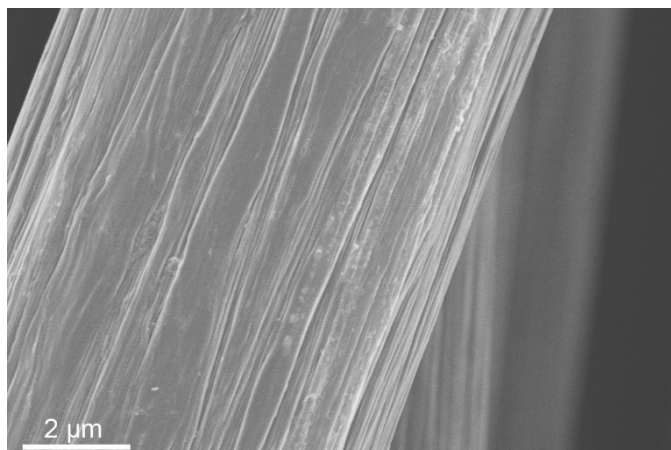

**Figure S1.** SEM images of blank CC.

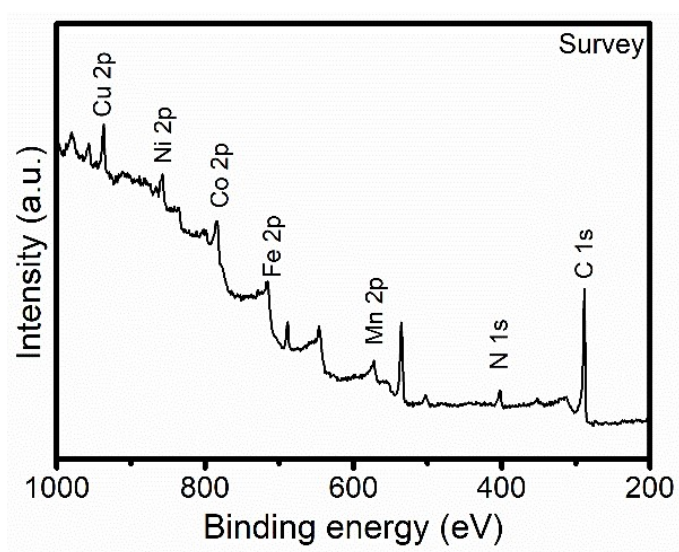

**Figure S2.** XPS survey of FeCoNiCuMnN/CC-400.

**Table S1.** Comparison of HER performance of FeCoNiCuMnN/CC-400 with other electrocatalysts in 1.0 M KOH solution.

| <b>Electrocatalyst</b>                                                               | <b>Overpotential (mV)</b>        | <b>Reference</b>                                           |
|--------------------------------------------------------------------------------------|----------------------------------|------------------------------------------------------------|
| PdPtCuNiP HEMG                                                                       | 32 (10 mA·cm <sup>-2</sup> )     | <i>Adv. Funct. Mater.</i> , 2021, 31, 2101586              |
| Mo doped CoS <sub>x</sub> /TM                                                        | 230 (10 mA·cm <sup>-2</sup> )    | <i>J. Electrochem. Soc.</i> , 2020, 167, 114510            |
| CoMoN <sub>x</sub> -500 NSAs/NF                                                      | 200 (10 mA·cm <sup>-2</sup> )    | <i>ACS Appl. Mater. Interfaces</i> , 2020, 12, 29253-29263 |
| NiCoFeMnCrP                                                                          | 220 (10 mA·cm <sup>-2</sup> )    | <i>J. Mater. Chem. A</i> , 2021, 9, 17913–17922            |
| Ni/NiO                                                                               | 226 (10 mA·cm <sup>-2</sup> )    | <i>Electrochim. Acta</i> , 2020, 361, 137040               |
| Pt <sub>18</sub> Ni <sub>26</sub> Fe <sub>15</sub> Co <sub>14</sub> Cu <sub>27</sub> | 11 (10 mA·cm <sup>-2</sup> )     | <i>Nat. Commun.</i> , 2020, 11, 1-9.                       |
| IrPdPtRhRu                                                                           | 17 (10 mA·cm <sup>-2</sup> )     | <i>Chem. Sci.</i> , 2020, 11, 12731–12736                  |
| CoNiO <sub>2</sub> /SNC                                                              | 330 mV (10 mA·cm <sup>-2</sup> ) | <i>RSC Adv.</i> , 2020, 10, 27788–27793                    |
| 3-Co-1T-MoS <sub>2</sub>                                                             | 240 (10 mA·cm <sup>-2</sup> )    | <i>Mater. Chem. Phys.</i> , 2020, 244, 122642              |
| Fe-Co-CN/rGO-700                                                                     | 215 (10 mA·cm <sup>-2</sup> )    | <i>Electrochim. Acta</i> , 2021, 365, 137384               |
| PdFeCoNiCu/C                                                                         | 18 (10 mA·cm <sup>-2</sup> )     | <i>J. Mater. Chem. A</i> , 2021, 9, 889–893                |
| FeCoNiCuMnN/CC-400                                                                   | 184 (10 mA·cm <sup>-2</sup> )    | This work                                                  |

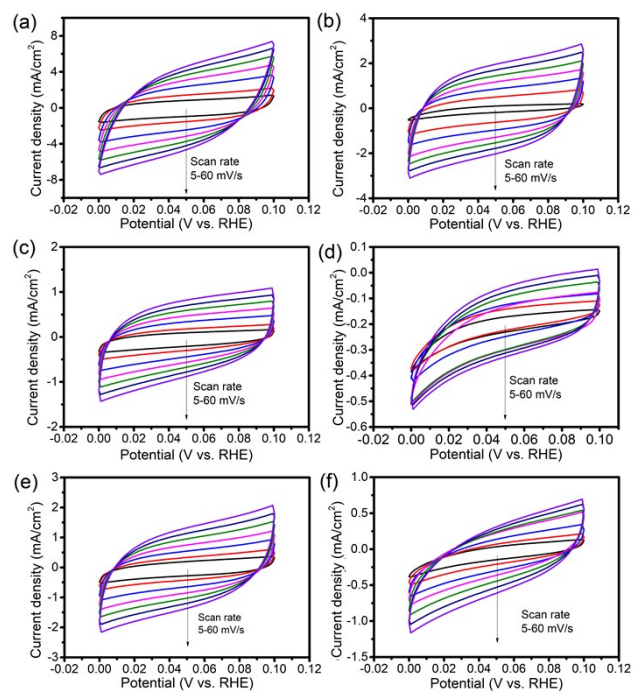

**Figure S3.** CV curves of (a) FeCoNiCuMnN/CC-400, FeCoNiN/CC, FeCoNiCuN/CC, FeCoNiMnN/CC, FeCoNiCuMnN/CC-500 and FeCoNiCuMnN/CC-300.
